# Supplementary material for: Comparative Analysis of Pesticide Use Determinants Among Smallholder Farmers From Costa Rica and Uganda
Source: PubMed Central journal article supplement — Environ Health Insights. 2020 Dec 14;14:1178630220972417. doi: 10.1177/1178630220972417 (PMC7739084; doi:10.1177/1178630220972417), 2020-12-14
Supplement: sj-pdf-1-ehi-10.1177_1178630220972417.pdf [file sj-pdf-1-ehi-10.1177_1178630220972417.pdf]

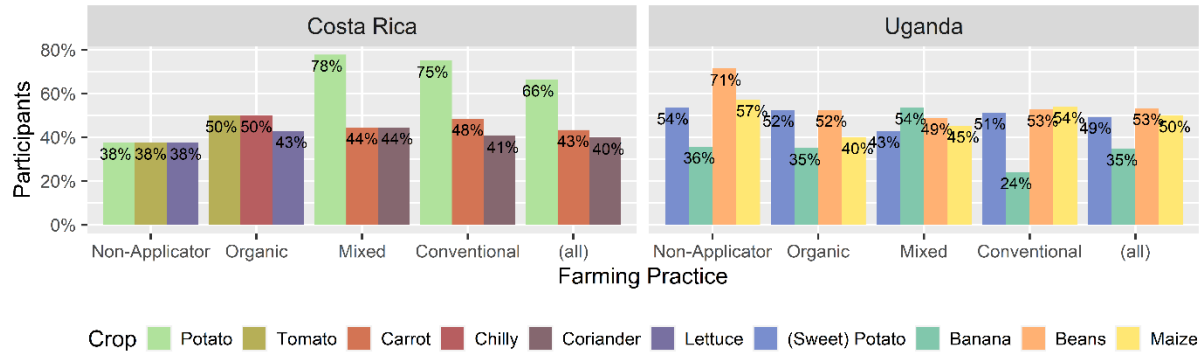

Supplementary Figure SF1: Major crops grown by country and farming practice. Major indicates the crops cultivated by the most farmers, not applying any threshold.

a) Costa Rica Household Income

|                            | n                               | multivariate<br>beta [95%-CI] | univariate<br>beta [95%-CI] |
|----------------------------|---------------------------------|-------------------------------|-----------------------------|
| Age                        | years 276                       | 0 [-0.01 to 0.01]             | 0.01 [0 to 0.01]            |
| Sex                        | Female 24                       | Reference                     | Reference                   |
|                            | Male 252                        | 0.21 [-0.23 to 0.65]          | 0.1 [-0.19 to 0.39]         |
| Education                  | Less than Primary 85            | Reference                     | Reference                   |
|                            | Primary 107                     | 0.11 [-0.03 to 0.25]          | 0.19 [0.05 to 0.33]         |
|                            | Secondary 44                    | 0.26 [0.06 to 0.46]           | 0.28 [0.07 to 0.49]         |
|                            | More than Secondary 40          | 0.32 [0.09 to 0.55]           | 0.37 [0.15 to 0.6]          |
| Nationality                | Costa Rica 154                  | Reference                     | Reference                   |
|                            | Nicaragua 122                   | -0.07 [-0.24 to 0.11]         | -0.23 [-0.37 to -0.09]      |
| Civil Status               | Married, Cohabitation 162       | Reference                     | Reference                   |
|                            | Single, Separated, Divorced 112 | -0.23 [-0.36 to -0.09]        | -0.23 [-0.35 to -0.1]       |
|                            | Widowed 2                       | -0.27 [-1.02 to 0.48]         | -0.17 [-0.97 to 0.63]       |
| Occupation                 | Farm Worker 181                 | Reference                     | Reference                   |
|                            | Farm Owner 181                  | 0.15 [-0.08 to 0.38]          | 0.33 [0.15 to 0.51]         |
| Working Hours              | hours/week 276                  | 0.01 [0 to 0.01]              | 0 [0 to 0.01]               |
| Experience in Agriculture  | years 276                       | 0 [-0.01 to 0.01]             | 0.01 [0 to 0.01]            |
| Experience with Pesticides | years 276                       | 0 [-0.01 to 0.01]             | 0.01 [0 to 0.01]            |
| Farming Practice           | Conventional 136                | Reference                     | Reference                   |
|                            | Mixed 63                        | -0.09 [-0.25 to 0.06]         | -0.15 [-0.31 to 0]          |
|                            | Organic 33                      | -0.08 [-0.25 to 0.09]         | -0.08 [-0.24 to 0.09]       |
|                            | Non-Applicator 44               | 0.13 [-0.11 to 0.38]          | -0.02 [-0.23 to 0.19]       |

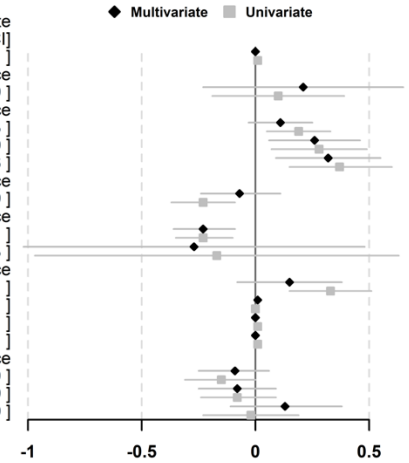

b) Uganda Household Income

|                            | n                              | multivariate<br>beta [95%-CI] | univariate<br>beta [95%-CI] |
|----------------------------|--------------------------------|-------------------------------|-----------------------------|
| Age                        | years 257                      | -0.02 [-0.03 to 0]            | -0.01 [-0.02 to 0]          |
| Sex                        | Female 91                      | Reference                     | Reference                   |
|                            | Male 166                       | 0.32 [-0.01 to 0.65]          | 0.74 [0.46 to 1.02]         |
| Education                  | Less than Primary 81           | Reference                     | Reference                   |
|                            | Primary 58                     | 0.24 [-0.14 to 0.62]          | 0.29 [-0.09 to 0.66]        |
|                            | Up to lower Secondary 90       | 0.39 [0.05 to 0.72]           | 0.67 [0.36 to 0.97]         |
|                            | Up to upper Secondary 13       | 1.12 [0.56 to 1.69]           | 1.24 [0.69 to 1.8]          |
|                            | More than Secondary 15         | 1.47 [0.95 to 1.99]           | 1.82 [1.4 to 2.24]          |
| Civil Status               | Married, Cohabitation 184      | Reference                     | Reference                   |
|                            | Single, Separated, Divorced 47 | -0.08 [-0.4 to 0.25]          | -0.41 [-0.76 to -0.05]      |
|                            | Widowed 26                     | -0.27 [-0.75 to 0.22]         | -0.95 [-1.39 to -0.51]      |
| Occupation                 | Crop Farmer 194                | Reference                     | Reference                   |
|                            | Other Occupation 194           | 0.32 [0.02 to 0.62]           | 0.64 [0.31 to 0.98]         |
| Working Hours              | hours/week 257                 | 0 [-0.01 to 0.01]             | 0 [-0.01 to 0.01]           |
| Farm size                  | hectars 257                    | 0.14 [0.05 to 0.24]           | 0.21 [0.11 to 0.32]         |
| Experience in Agriculture  | years 257                      | 0 [-0.01 to 0.01]             | -0.01 [-0.02 to 0]          |
| Experience with Pesticides | years 257                      | 0.01 [0 to 0.03]              | 0.01 [0 to 0.02]            |
| Farming Practice           | Conventional 145               | Reference                     | Reference                   |
|                            | Mixed 80                       | 0.37 [0.07 to 0.67]           | 0.4 [0.07 to 0.72]          |
|                            | Organic 22                     | 0.11 [-0.31 to 0.53]          | -0.25 [-0.74 to 0.24]       |
|                            | Non-Applicator 10              | 0.56 [-0.64 to 1.75]          | -0.1 [-0.7 to 0.51]         |

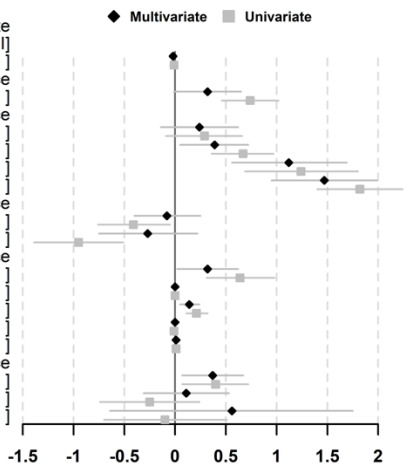

c) Costa Rica Pesticide Training

|                            | n                              | multivariate<br>OR [95%-CI] | univariate<br>OR [95%-CI] |
|----------------------------|--------------------------------|-----------------------------|---------------------------|
| Age                        | years 250                      | 1.01 [0.96 to 1.06]         | 1.04 [1.02 to 1.06]       |
| Education                  | Less than Primary 73           | Reference                   | Reference                 |
|                            | Primary 102                    | 2.58 [1.22 to 5.51]         | 3.66 [1.95 to 7.04]       |
|                            | Secondary 42                   | 3.21 [1.26 to 8.38]         | 3 [1.37 to 6.71]          |
|                            | More than Secondary 33         | 2.92 [0.98 to 8.95]         | 2.34 [1.02 to 5.44]       |
| Nationality                | Costa Rica 146                 | Reference                   | Reference                 |
|                            | Nicaragua 104                  | 0.77 [0.35 to 1.71]         | 0.35 [0.2 to 0.58]        |
| Civil Status               | Married, Cohabitation 152      | Reference                   | Reference                 |
|                            | Single, Separated, Divorced 96 | 0.65 [0.33 to 1.29]         | 0.58 [0.35 to 0.97]       |
|                            | Widowed 2                      | 1.02 [0.04 to 28.84]        | 0.87 [0.03 to 22.2]       |
| Occupation                 | Farm Worker 148                | Reference                   | Reference                 |
|                            | Farm Owner 148                 | 1.68 [0.76 to 3.73]         | 3.62 [2.15 to 6.19]       |
| Working Hours              | hours/week 250                 | 1.01 [0.99 to 1.03]         | 1.01 [0.99 to 1.02]       |
| Experience in Agriculture  | years 250                      | 1.04 [0.98 to 1.12]         | 1.04 [1.02 to 1.05]       |
| Experience with Pesticides | years 250                      | 0.97 [0.9 to 1.03]          | 1.03 [1.02 to 1.05]       |
| Farming Practice           | Conventional 146               | Reference                   | Reference                 |
|                            | Mixed 70                       | 0.82 [0.43 to 1.58]         | 0.76 [0.43 to 1.34]       |
|                            | Organic 34                     | 3.18 [1.35 to 7.97]         | 2.3 [1.07 to 5.21]        |

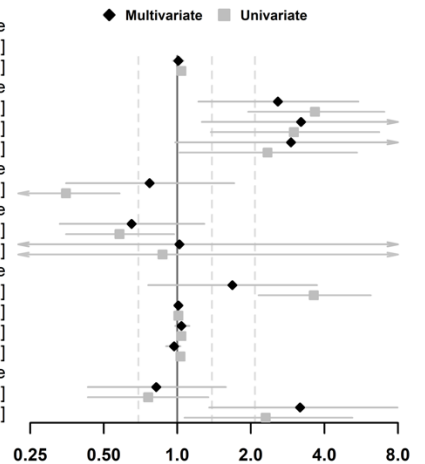

d) Uganda Pesticide Training

|                            | n                              | multivariate<br>OR [95%-CI] | univariate<br>OR [95%-CI] |
|----------------------------|--------------------------------|-----------------------------|---------------------------|
| Age                        | years 260                      | 1 [0.97 to 1.04]            | 0.99 [0.98 to 1.01]       |
| Sex                        | Female 93                      | Reference                   | Reference                 |
|                            | Male 167                       | 0.96 [0.41 to 2.31]         | 0.97 [0.56 to 1.68]       |
| Education                  | Less than Primary 82           | Reference                   | Reference                 |
|                            | Primary 58                     | 1.48 [0.44 to 4.96]         | 1.15 [0.42 to 3.02]       |
|                            | Up to lower Secondary 91       | 5.5 [2.17 to 15.74]         | 3.84 [1.86 to 8.47]       |
|                            | Up to upper Secondary 13       | 11.76 [2.68 to 53.92]       | 7.91 [2.6 to 24.82]       |
|                            | More than Secondary 16         | 3.35 [0.63 to 16.67]        | 4.52 [1.52 to 13.27]      |
| Civil Status               | Married, Cohabitation 185      | Reference                   | Reference                 |
|                            | Single, Separated, Divorced 49 | 2.05 [0.84 to 4.93]         | 1.55 [0.82 to 2.86]       |
|                            | Widowed 26                     | 1.23 [0.3 to 4.6]           | 0.9 [0.34 to 2.09]        |
| Occupation                 | Crop Farmer 197                | Reference                   | Reference                 |
|                            | Other Occupation 197           | 0.92 [0.4 to 2.05]          | 1.59 [0.87 to 2.85]       |
| Working Hours              | hours/week 260                 | 1.01 [0.99 to 1.03]         | 0.99 [0.97 to 1.01]       |
| Farm size                  | hectars 260                    | 1.04 [0.79 to 1.32]         | 1.09 [0.9 to 1.29]        |
| Experience in Agriculture  | years 260                      | 0.97 [0.93 to 1.01]         | 0.99 [0.97 to 1.01]       |
| Experience with Pesticides | years 260                      | 1.05 [1.01 to 1.09]         | 1.01 [0.99 to 1.03]       |
| Farming Practice           | Conventional 145               | Reference                   | Reference                 |
|                            | Mixed 81                       | 2.63 [1.22 to 5.79]         | 3.07 [1.62 to 5.92]       |
|                            | Organic 23                     | 5.55 [1.66 to 18.74]        | 4.1 [1.86 to 9]           |
|                            | Non-Applicator 11              | 0.56 [0.03 to 3.97]         | 1.02 [0.28 to 2.99]       |

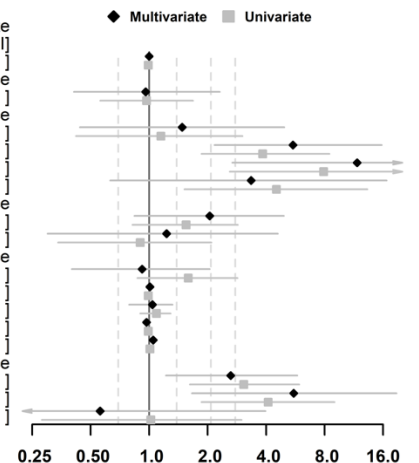

Supplementary Figure SF2: a) and b): Forest plot with coefficients for robust regression of logarithmic household income and its predictors. c) and d) Forest plot with Odds Ratio for logistic regression of received pesticide training and its predictors.

Supplementary Table ST1: Variables and questions used in the survey. Stars (\*) denote that the question or the answer is referring to the list of options in Supplementary Table ST2, indicating either repetition of the question for each item on the list, or the option to select any item from the list.

| Variable name and question                                                                                                                                                                              | Type                                                  | Unit / Categories                                                     |
|---------------------------------------------------------------------------------------------------------------------------------------------------------------------------------------------------------|-------------------------------------------------------|-----------------------------------------------------------------------|
| <b>Socio-demographic characteristics</b>                                                                                                                                                                |                                                       |                                                                       |
| Sex                                                                                                                                                                                                     | Single choice                                         | Female<br>Male                                                        |
| Age: “How old are you?”                                                                                                                                                                                 | Integer                                               | Years                                                                 |
| Education, derived from: “What is the highest level of school you completed? Which specific year?”                                                                                                      | Integer                                               | Years                                                                 |
| Marital status: “What is your current marital status?”                                                                                                                                                  | Single choice                                         | Single<br>Married<br>Cohabitation<br>Separated<br>Divorced<br>Widowed |
| Nationality: “What country were you born in?”                                                                                                                                                           | Single choice                                         | Costa Rica<br>Nicaragua<br>Uganda<br>Tanzania<br>Rwanda               |
| <b>Socio-economic and occupational characteristics</b>                                                                                                                                                  |                                                       |                                                                       |
| (Farming) practice                                                                                                                                                                                      | Derived from pesticide use and occupational variables | Non-Applicator<br>Organic<br>Mixed<br>Conventional                    |
| Years of experience in agriculture, derived from age and “How old were you when you started working on agricultural farms?” and age                                                                     | Integer                                               | Years                                                                 |
| Years of experience spraying/handling pesticides, derived from age and “At what age did you start mixing or applying synthetic pesticides?”                                                             | Integer                                               | Years                                                                 |
| Monthly household income: “On average how much money do you make in a month? Please include everyone who contributes to the income of the household: Household head, partner, children, relatives etc.” | Integer                                               | Costa Rican Colon (CRC) / Ugandan Shilling (UGX)                      |

| <b>Variable name and question</b>                                                                                                                                                                                                                                           | <b>Type</b>     | <b>Unit / Categories</b>                                                                                               |
|-----------------------------------------------------------------------------------------------------------------------------------------------------------------------------------------------------------------------------------------------------------------------------|-----------------|------------------------------------------------------------------------------------------------------------------------|
| Job position / main profession: “How do you consider your position in relation to that farm?” / “What is your main occupation?”                                                                                                                                             | Single Choice   | Costa Rica:<br>Producer (Farm owner)<br>Farm worker<br>Uganda:<br>Crop Farmer<br>Other (aggregated from other options) |
| Worktime, derived from “On average, how many hours do you spend per working day in the field?” and “On average, on all the farms together, how many days do you work per week?”                                                                                             | Integer         | Hours per week                                                                                                         |
| Pesticide active ingredients used at the farm over the last twelve months, derived from “During the last twelve months, have you prepared or applied this pesticide* in your farms for crops, for your livestock, or against pests around your house or inside your house?” | Single choice   | No<br>Yes<br>Don’t know                                                                                                |
| Pesticide active ingredients used at the farm over the last seven days, derived from “Have you prepared or applied this pesticide* in the last seven days?”                                                                                                                 | Single choice   | No<br>Yes<br>Don’t know                                                                                                |
| For each active ingredient*: “How many hours have you applied this pesticide in the last seven days?”                                                                                                                                                                       | Integer         | Hours per week                                                                                                         |
| For each active ingredient*: “On how many acres have you used this pesticide in the last twelve months?”                                                                                                                                                                    | Integer         | Hectares (derived from acres)                                                                                          |
| Farm size: “In acres, how big is the total area you are cultivating crops on these farms?”                                                                                                                                                                                  | Integer         | Hectares                                                                                                               |
| Crops cultivated: “What are the three major crop you are currently growing?”                                                                                                                                                                                                | Multiple choice | List of country specific crops*                                                                                        |
| Distance between farm and water source: “How many meters is your farm away from a river or spring?”                                                                                                                                                                         | Integer         | Meters                                                                                                                 |
| <b>Knowledge, attitude and practices</b>                                                                                                                                                                                                                                    |                 |                                                                                                                        |
| Training in pesticide use “Have you ever been trained on how to apply pesticides?”                                                                                                                                                                                          | Single choice   | No<br>Yes<br>Don’t know                                                                                                |
| Training provider: “Who trained you?”                                                                                                                                                                                                                                       | Text            | -                                                                                                                      |
| Health risk awareness: “Do you believe that pesticides can affect your own health?”                                                                                                                                                                                         | Single choice   | No<br>Yes<br>Don’t know                                                                                                |
| Entry sites to the body: “Through which body parts do you think pesticides can enter us?”                                                                                                                                                                                   | Multiple choice | Skin<br>Nose<br>Mouth<br>Eyes                                                                                          |

| Variable name and question                                                                                        | Type            | Unit / Categories                                                                                                                                                     |
|-------------------------------------------------------------------------------------------------------------------|-----------------|-----------------------------------------------------------------------------------------------------------------------------------------------------------------------|
|                                                                                                                   |                 | None<br>Other (specify)                                                                                                                                               |
| Bathing after handling/application of pesticides: “How long after you applied pesticides do you take a bath?”     | Single choice   | Immediately after<br>Few hours later<br>Many hours later<br>The next day or later                                                                                     |
| Changing of clothes: “How long after you applied pesticides do you change your clothes?”                          | Single choice   | Immediately after<br>Few hours later<br>Many hours later<br>The next day or later                                                                                     |
| Clothes washing: “Who washes the clothes used in pesticide application?”                                          | Single choice   | Me<br>Family Member<br>Washerwoman<br>They aren’t washed                                                                                                              |
| Disposal of residual water: “Where do you discharge the water after washing the pesticide application equipment?” | Multiple choice | On the farm<br>Garden of the house<br>In the drain<br>In the river<br>In the biobed<br>In the pit latrine / in the garbage<br>Where pesticides are mixed              |
| Container disposal: “What do you do with empty pesticide containers or bags?”                                     | Multiple choice | Bury them<br>Recycling<br>Leave in the field/garden<br>Throw in pit latrine<br>Dispose in garbage/landfill<br>Burn them<br>Kept for unknown reasons<br>Kept for reuse |
| PPE* access: “Do you have access to this equipment?”                                                              | Single choice   | No<br>Yes<br>Don’t know                                                                                                                                               |
| PPE* wearing “Do you wear this protective equipment when preparing or applying pesticides?”                       | Single choice   | No<br>Yes<br>Don’t know                                                                                                                                               |
| PPE* frequency: “How often do you use this protective equipment when preparing or applying pesticides?”           | Single choice   | Always (100%)<br>Often (75%)<br>Sometimes (50%)<br>Rarely (25%)<br>Never (0%)                                                                                         |

| Variable name and question | Type | Unit / Categories |
|----------------------------|------|-------------------|
|                            |      | Don't know        |

Supplementary Table ST2: Listed options and variables for starred (\*) items in Supplementary Table ST1.

|                                                 |                                                                                                                                                                                                                 |
|-------------------------------------------------|-----------------------------------------------------------------------------------------------------------------------------------------------------------------------------------------------------------------|
| List of pesticide active ingredients Costa Rica | Boscalid<br>Carbendazim<br>Chlorothalonil<br>Mancozeb<br>Propamocarb<br>Propineb<br>Glyphosate<br>Paraquat<br>Acephate<br>Benfuracarb<br>Carbofuran<br>Chlorpyrifos<br>Cypermethrin<br>Fenamiphos<br>Phorate    |
| List of pesticide active ingredients Uganda     | Mancozeb<br>2,4-D<br>Glyphosate<br>Paraquat<br>Carbaryl<br>Carbofuran<br>Chlorpyrifos<br>Cypermethrin<br>Deltamethrin<br>Diazinon<br>Dichlorvos<br>Dimethoate<br>Lambda-Cyhalothrin<br>Permethrin<br>Profenofos |
| List of crops Costa Rica                        | Cabbage<br>Carrot<br>Cauliflower<br>Chilly<br>Coriander<br>Egg plant<br>Flowers<br>Garlic<br>Lettuce<br>Onions                                                                                                  |

|                      |                                                                                                                                                                                                                                                                                                                                               |
|----------------------|-----------------------------------------------------------------------------------------------------------------------------------------------------------------------------------------------------------------------------------------------------------------------------------------------------------------------------------------------|
|                      | <ul style="list-style-type: none"> <li>Parsley</li> <li>Potato</li> <li>Tomato</li> <li>Other (specify)</li> </ul>                                                                                                                                                                                                                            |
| List of Crops Uganda | <ul style="list-style-type: none"> <li>Banana</li> <li>Beans</li> <li>Cassava</li> <li>Ground nuts</li> <li>Maize</li> <li>Okra</li> <li>Onion</li> <li>Passion Fruit</li> <li>Pepper</li> <li>Sugar cane</li> <li>Sweet (potato)</li> <li>Water melon</li> <li>Yam</li> <li>Other (specify)</li> </ul>                                       |
| List of PPE          | <ul style="list-style-type: none"> <li>Hat</li> <li>Glasses</li> <li>Mask with carbon filter</li> <li>Mask without carbon filter</li> <li>Long-sleeved shirt</li> <li>Poncho</li> <li>Overall or kimono</li> <li>Rubber apron</li> <li>Gloves</li> <li>Long pants</li> <li>Waterproof pants</li> <li>Gaiters</li> <li>Rubber boots</li> </ul> |
